# Supplementary material
Source: Springer Nature journal article supplement (https://www.springermedizin.de/resource/supplementary/13054_2011_499_MOESM6_ESM.pdf/9708618)

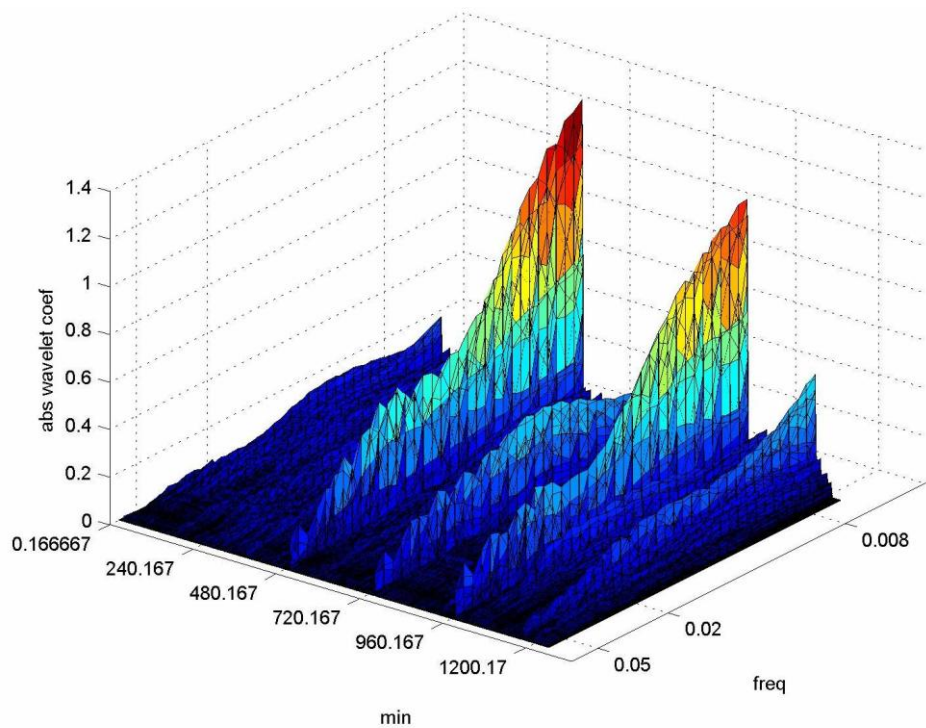

**A**

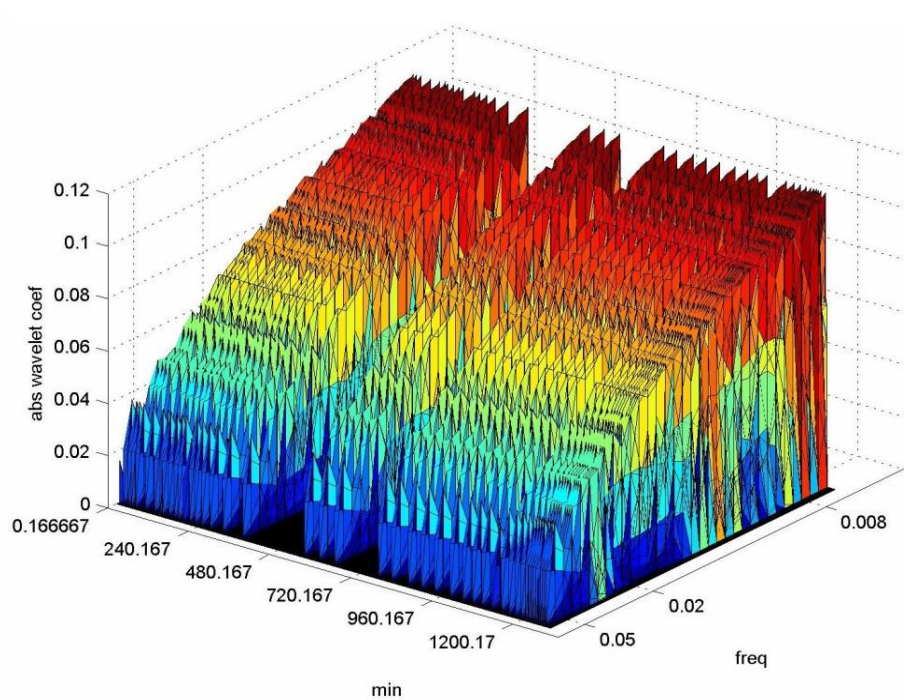

**B**

Supplement: MOESM6 [file 9708618]
